# Supplementary material
Source: PubMed Central journal article supplement (PMC6384077)
Supplement: JVI.01783-18-s0001.pdf [file JVI.01783-18-s0001.pdf]

**Table S1.** Statistical results<sup>§</sup> for all comparisons between groups with and without bnAb.

| Assay                 | Note                           | group1   | group2       | week | variable         | unadjusted.p | FDR_p |
|-----------------------|--------------------------------|----------|--------------|------|------------------|--------------|-------|
| BAMA                  | Antigen = bama_1086c_gp140     | Env only | Env+bnAb     | 2    | bama_1086c_gp140 | 0.1746       | 1.00  |
| BAMA                  | Antigen = bama_1086c_gp140     | Env only | Env+bnAb     | 8    | bama_1086c_gp140 | 0.2222       | 1.00  |
| BAMA                  | Antigen = bama_1086c_gp140     | Env only | Env+bnAb     | 14   | bama_1086c_gp140 | 0.5476       | 1.00  |
| BAMA                  | Antigen = bama_1086c_gp140     | MVA/Env  | MVA/Env+bnAb | 2    | bama_1086c_gp140 | 0.9603       | 1.00  |
| BAMA                  | Antigen = bama_1086c_gp140     | MVA/Env  | MVA/Env+bnAb | 8    | bama_1086c_gp140 | 0.6905       | 1.00  |
| BAMA                  | Antigen = bama_1086c_gp140     | MVA/Env  | MVA/Env+bnAb | 14   | bama_1086c_gp140 | 0.2222       | 1.00  |
| Neutralization        | Virus = MW965.26.LucR.T2A.ecto | Env only | Env+bnAb     | 2    | point_ic50       | 0.2063       | 1.00  |
| Neutralization        | Virus = MW965.26.LucR.T2A.ecto | Env only | Env+bnAb     | 8    | point_ic50       | 0.6905       | 1.00  |
| Neutralization        | Virus = MW965.26.LucR.T2A.ecto | Env only | Env+bnAb     | 14   | point_ic50       | 0.0952       | 1.00  |
| Neutralization        | Virus = MW965.26.LucR.T2A.ecto | MVA/Env  | MVA/Env+bnAb | 2    | point_ic50       | 1.0000       | 1.00  |
| Neutralization        | Virus = MW965.26.LucR.T2A.ecto | MVA/Env  | MVA/Env+bnAb | 8    | point_ic50       | 0.5476       | 1.00  |
| Neutralization        | Virus = MW965.26.LucR.T2A.ecto | MVA/Env  | MVA/Env+bnAb | 14   | point_ic50       | 0.8413       | 1.00  |
| Infected Cell Binding | Against 1086C                  | Env only | Env+bnAb     | 2    | Inf1086CMFI      | 0.6984       | 1.00  |
| Infected Cell Binding | Against 1086C                  | Env only | Env+bnAb     | 8    | Inf1086CMFI      | 0.8413       | 1.00  |
| Infected Cell Binding | Against 1086C                  | Env only | Env+bnAb     | 14   | Inf1086CMFI      | 1.0000       | 1.00  |
| Infected Cell Binding | Against 1086C                  | MVA/Env  | MVA/Env+bnAb | 2    | Inf1086CMFI      | 0.8730       | 1.00  |
| Infected Cell Binding | Against 1086C                  | MVA/Env  | MVA/Env+bnAb | 8    | Inf1086CMFI      | 0.8413       | 1.00  |
| Infected Cell Binding | Against 1086C                  | MVA/Env  | MVA/Env+bnAb | 14   | Inf1086CMFI      | 0.4206       | 1.00  |
| ADCC                  | Titer                          | Env only | Env+bnAb     | 2    | Titer            | 1.0000       | 1.00  |
| ADCC                  | Titer                          | Env only | Env+bnAb     | 8    | Titer            | 0.6905       | 1.00  |
| ADCC                  | Titer                          | Env only | Env+bnAb     | 14   | Titer            | 0.6905       | 1.00  |
| ADCC                  | Titer                          | MVA/Env  | MVA/Env+bnAb | 2    | Titer            | 1.0000       | 1.00  |
| ADCC                  | Titer                          | MVA/Env  | MVA/Env+bnAb | 8    | Titer            | 0.8413       | 1.00  |
| ADCC                  | Titer                          | MVA/Env  | MVA/Env+bnAb | 14   | Titer            | 0.5476       | 1.00  |
| sCD4 Blocking         | Percent CD4 Blocking           | Env only | Env+bnAb     | 1    | Percentage_CD4_B | 1.0000       | 1.00  |
| sCD4 Blocking         | Percent CD4 Blocking           | Env only | Env+bnAb     | 2    | Percentage_CD4_B | 1.0000       | 1.00  |
| sCD4 Blocking         | Percent CD4 Blocking           | Env only | Env+bnAb     | 8    | Percentage_CD4_B | 0.3095       | 1.00  |
| sCD4 Blocking         | Percent CD4 Blocking           | Env only | Env+bnAb     | 14   | Percentage_CD4_B | 0.6905       | 1.00  |
| sCD4 Blocking         | Percent CD4 Blocking           | MVA/Env  | MVA/Env+bnAb | 1    | Percentage_CD4_B | 1.0000       | 1.00  |
| sCD4 Blocking         | Percent CD4 Blocking           | MVA/Env  | MVA/Env+bnAb | 2    | Percentage_CD4_B | 1.0000       | 1.00  |
| sCD4 Blocking         | Percent CD4 Blocking           | MVA/Env  | MVA/Env+bnAb | 8    | Percentage_CD4_B | 0.0317       | 1.00  |
| sCD4 Blocking         | Percent CD4 Blocking           | MVA/Env  | MVA/Env+bnAb | 14   | Percentage_CD4_B | 0.8413       | 1.00  |

|       |                                |          |              |                     |        |      |
|-------|--------------------------------|----------|--------------|---------------------|--------|------|
| Elisa | Antigen = 1086.c.gp120 NHP IgG | Env only | Env+bnAb     | 2 conc_binding_abs  | 0.1111 | 1.00 |
| Elisa | Antigen = 1086.c.gp120 NHP IgG | Env only | Env+bnAb     | 8 conc_binding_abs  | 0.8413 | 1.00 |
| Elisa | Antigen = 1086.c.gp120 NHP IgG | Env only | Env+bnAb     | 14 conc_binding_abs | 0.2222 | 1.00 |
| Elisa | Antigen = 1086.c.gp120 NHP IgG | MVA/Env  | MVA/Env+bnAb | 2 conc_binding_abs  | 0.9048 | 1.00 |
| Elisa | Antigen = 1086.c.gp120 NHP IgG | MVA/Env  | MVA/Env+bnAb | 8 conc_binding_abs  | 0.8413 | 1.00 |
| Elisa | Antigen = 1086.c.gp120 NHP IgG | MVA/Env  | MVA/Env+bnAb | 14 conc_binding_abs | 1.0000 | 1.00 |
| BAMA  | Antigen = gp140_mean           | Env only | Env+bnAb     | 2 gp140_mean        | 0.2143 | 1.00 |
| BAMA  | Antigen = gp140_mean           | Env only | Env+bnAb     | 8 gp140_mean        | 0.2222 | 1.00 |
| BAMA  | Antigen = gp140_mean           | Env only | Env+bnAb     | 14 gp140_mean       | 1.0000 | 1.00 |
| BAMA  | Antigen = gp140_mean           | MVA/Env  | MVA/Env+bnAb | 2 gp140_mean        | 0.9762 | 1.00 |
| BAMA  | Antigen = gp140_mean           | MVA/Env  | MVA/Env+bnAb | 8 gp140_mean        | 0.8413 | 1.00 |
| BAMA  | Antigen = gp140_mean           | MVA/Env  | MVA/Env+bnAb | 14 gp140_mean       | 0.6905 | 1.00 |
| BAMA  | Antigen = gp120_mean           | Env only | Env+bnAb     | 2 gp120_mean        | 0.5556 | 1.00 |
| BAMA  | Antigen = gp120_mean           | Env only | Env+bnAb     | 8 gp120_mean        | 0.6905 | 1.00 |
| BAMA  | Antigen = gp120_mean           | Env only | Env+bnAb     | 14 gp120_mean       | 0.8413 | 1.00 |
| BAMA  | Antigen = gp120_mean           | MVA/Env  | MVA/Env+bnAb | 2 gp120_mean        | 0.9048 | 1.00 |
| BAMA  | Antigen = gp120_mean           | MVA/Env  | MVA/Env+bnAb | 8 gp120_mean        | 1.0000 | 1.00 |
| BAMA  | Antigen = gp120_mean           | MVA/Env  | MVA/Env+bnAb | 14 gp120_mean       | 0.2222 | 1.00 |
| BAMA  | Antigen = V1V2_mean            | Env only | Env+bnAb     | 2 V1V2_mean         | 0.2857 | 1.00 |
| BAMA  | Antigen = V1V2_mean            | Env only | Env+bnAb     | 8 V1V2_mean         | 0.3095 | 1.00 |
| BAMA  | Antigen = V1V2_mean            | Env only | Env+bnAb     | 14 V1V2_mean        | 0.4206 | 1.00 |
| BAMA  | Antigen = V1V2_mean            | MVA/Env  | MVA/Env+bnAb | 2 V1V2_mean         | 1.0000 | 1.00 |
| BAMA  | Antigen = V1V2_mean            | MVA/Env  | MVA/Env+bnAb | 8 V1V2_mean         | 1.0000 | 1.00 |
| BAMA  | Antigen = V1V2_mean            | MVA/Env  | MVA/Env+bnAb | 14 V1V2_mean        | 0.6905 | 1.00 |
| BAMA  | Antigen = V3_mean              | Env only | Env+bnAb     | 2 V3_mean           | 0.1905 | 1.00 |
| BAMA  | Antigen = V3_mean              | Env only | Env+bnAb     | 8 V3_mean           | 0.1508 | 1.00 |
| BAMA  | Antigen = V3_mean              | Env only | Env+bnAb     | 14 V3_mean          | 0.4206 | 1.00 |
| BAMA  | Antigen = V3_mean              | MVA/Env  | MVA/Env+bnAb | 2 V3_mean           | 0.9048 | 1.00 |
| BAMA  | Antigen = V3_mean              | MVA/Env  | MVA/Env+bnAb | 8 V3_mean           | 1.0000 | 1.00 |
| BAMA  | Antigen = V3_mean              | MVA/Env  | MVA/Env+bnAb | 14 V3_mean          | 0.4206 | 1.00 |
| BAMA  | Antigen = bio_v2_b             | Env only | Env+bnAb     | 2 bio_v2_b          | 0.0397 | 1.00 |
| BAMA  | Antigen = bio_v2_b             | Env only | Env+bnAb     | 8 bio_v2_b          | 1.0000 | 1.00 |
| BAMA  | Antigen = bio_v2_b             | Env only | Env+bnAb     | 14 bio_v2_b         | 0.4206 | 1.00 |
| BAMA  | Antigen = bio_v2_b             | MVA/Env  | MVA/Env+bnAb | 2 bio_v2_b          | 0.9048 | 1.00 |

|                 |                      |          |              |              |        |      |
|-----------------|----------------------|----------|--------------|--------------|--------|------|
| BAMA            | Antigen = bio_v2_b   | MVA/Env  | MVA/Env+bnAb | 8 bio_v2_b   | 0.5476 | 1.00 |
| BAMA            | Antigen = bio_v2_b   | MVA/Env  | MVA/Env+bnAb | 14 bio_v2_b  | 1.0000 | 1.00 |
| BAMA            | Antigen = c5_c       | Env only | Env+bnAb     | 2 c5_c       | 0.3651 | 1.00 |
| BAMA            | Antigen = c5_c       | Env only | Env+bnAb     | 8 c5_c       | 1.0000 | 1.00 |
| BAMA            | Antigen = c5_c       | Env only | Env+bnAb     | 14 c5_c      | 0.6905 | 1.00 |
| BAMA            | Antigen = c5_c       | MVA/Env  | MVA/Env+bnAb | 2 c5_c       | 1.0000 | 1.00 |
| BAMA            | Antigen = c5_c       | MVA/Env  | MVA/Env+bnAb | 8 c5_c       | 0.8413 | 1.00 |
| BAMA            | Antigen = c5_c       | MVA/Env  | MVA/Env+bnAb | 14 c5_c      | 0.6905 | 1.00 |
| BAMA            | Antigen = c1_biotin  | Env only | Env+bnAb     | 2 c1_biotin  | 0.1111 | 1.00 |
| BAMA            | Antigen = c1_biotin  | Env only | Env+bnAb     | 8 c1_biotin  | 1.0000 | 1.00 |
| BAMA            | Antigen = c1_biotin  | Env only | Env+bnAb     | 14 c1_biotin | 0.6905 | 1.00 |
| BAMA            | Antigen = c1_biotin  | MVA/Env  | MVA/Env+bnAb | 2 c1_biotin  | 0.7778 | 1.00 |
| BAMA            | Antigen = c1_biotin  | MVA/Env  | MVA/Env+bnAb | 8 c1_biotin  | 0.3095 | 1.00 |
| BAMA            | Antigen = c1_biotin  | MVA/Env  | MVA/Env+bnAb | 14 c1_biotin | 0.4206 | 1.00 |
| Epitope Mapping | Epitope = C1.1_34-36 | Env only | Env+bnAb     | 2 Signal     | 0.7222 | 1.00 |
| Epitope Mapping | Epitope = C1.1_34-36 | Env only | Env+bnAb     | 8 Signal     | 0.2063 | 1.00 |
| Epitope Mapping | Epitope = C1.1_34-36 | MVA/Env  | MVA/Env+bnAb | 2 Signal     | 0.1667 | 1.00 |
| Epitope Mapping | Epitope = C1.1_34-36 | MVA/Env  | MVA/Env+bnAb | 8 Signal     | 0.3810 | 1.00 |
| Epitope Mapping | Epitope = V2_53-55   | Env only | Env+bnAb     | 2 Signal     | 0.1667 | 1.00 |
| Epitope Mapping | Epitope = V2_53-55   | Env only | Env+bnAb     | 8 Signal     | 0.2857 | 1.00 |
| Epitope Mapping | Epitope = V2_53-55   | MVA/Env  | MVA/Env+bnAb | 2 Signal     | 1.0000 | 1.00 |
| Epitope Mapping | Epitope = V2_53-55   | MVA/Env  | MVA/Env+bnAb | 8 Signal     | 0.1429 | 1.00 |
| Epitope Mapping | Epitope = C2.1_65-67 | Env only | Env+bnAb     | 2 Signal     | 0.7222 | 1.00 |
| Epitope Mapping | Epitope = C2.1_65-67 | Env only | Env+bnAb     | 8 Signal     | 0.4048 | 1.00 |
| Epitope Mapping | Epitope = C2.1_65-67 | MVA/Env  | MVA/Env+bnAb | 2 Signal     | 0.4444 | 1.00 |
| Epitope Mapping | Epitope = C2.1_65-67 | MVA/Env  | MVA/Env+bnAb | 8 Signal     | 1.0000 | 1.00 |
| Epitope Mapping | Epitope = C2.2_70-73 | Env only | Env+bnAb     | 2 Signal     | 0.4048 | 1.00 |
| Epitope Mapping | Epitope = C2.2_70-73 | Env only | Env+bnAb     | 8 Signal     | 0.0635 | 1.00 |
| Epitope Mapping | Epitope = C2.2_70-73 | MVA/Env  | MVA/Env+bnAb | 2 Signal     | 0.8413 | 1.00 |
| Epitope Mapping | Epitope = C2.2_70-73 | MVA/Env  | MVA/Env+bnAb | 8 Signal     | 0.4921 | 1.00 |
| Epitope Mapping | Epitope = C2.4_88-89 | Env only | Env+bnAb     | 2 Signal     | 1.0000 | 1.00 |
| Epitope Mapping | Epitope = C2.4_88-89 | Env only | Env+bnAb     | 8 Signal     | 1.0000 | 1.00 |
| Epitope Mapping | Epitope = C2.4_88-89 | MVA/Env  | MVA/Env+bnAb | 2 Signal     | 1.0000 | 1.00 |
| Epitope Mapping | Epitope = C2.4_88-89 | MVA/Env  | MVA/Env+bnAb | 8 Signal     | 1.0000 | 1.00 |

|                       |                        |          |              |                |        |      |
|-----------------------|------------------------|----------|--------------|----------------|--------|------|
| Epitope Mapping       | Epitope = V3_99-102    | Env only | Env+bnAb     | 2 Signal       | 0.3095 | 1.00 |
| Epitope Mapping       | Epitope = V3_99-102    | Env only | Env+bnAb     | 8 Signal       | 0.3095 | 1.00 |
| Epitope Mapping       | Epitope = V3_99-102    | MVA/Env  | MVA/Env+bnAb | 2 Signal       | 0.9762 | 1.00 |
| Epitope Mapping       | Epitope = V3_99-102    | MVA/Env  | MVA/Env+bnAb | 8 Signal       | 0.4206 | 1.00 |
| Epitope Mapping       | Epitope = C3_112-114   | Env only | Env+bnAb     | 2 Signal       | 0.4444 | 1.00 |
| Epitope Mapping       | Epitope = C3_112-114   | Env only | Env+bnAb     | 8 Signal       | 1.0000 | 1.00 |
| Epitope Mapping       | Epitope = C3_112-114   | MVA/Env  | MVA/Env+bnAb | 2 Signal       | 1.0000 | 1.00 |
| Epitope Mapping       | Epitope = C3_112-114   | MVA/Env  | MVA/Env+bnAb | 8 Signal       | 0.9365 | 1.00 |
| Epitope Mapping       | Epitope = C3.2_116-117 | Env only | Env+bnAb     | 2 Signal       | 0.7222 | 1.00 |
| Epitope Mapping       | Epitope = C3.2_116-117 | Env only | Env+bnAb     | 8 Signal       | 1.0000 | 1.00 |
| Epitope Mapping       | Epitope = C3.2_116-117 | MVA/Env  | MVA/Env+bnAb | 2 Signal       | 1.0000 | 1.00 |
| Epitope Mapping       | Epitope = C3.2_116-117 | MVA/Env  | MVA/Env+bnAb | 8 Signal       | 0.0476 | 1.00 |
| Epitope Mapping       | Epitope = V5_146-149   | Env only | Env+bnAb     | 2 Signal       | 0.4048 | 1.00 |
| Epitope Mapping       | Epitope = V5_146-149   | Env only | Env+bnAb     | 8 Signal       | 0.4603 | 1.00 |
| Epitope Mapping       | Epitope = V5_146-149   | MVA/Env  | MVA/Env+bnAb | 2 Signal       | 1.0000 | 1.00 |
| Epitope Mapping       | Epitope = V5_146-149   | MVA/Env  | MVA/Env+bnAb | 8 Signal       | 0.5476 | 1.00 |
| Epitope Mapping       | Epitope = C5.1_152-153 | Env only | Env+bnAb     | 2 Signal       | 1.0000 | 1.00 |
| Epitope Mapping       | Epitope = C5.1_152-153 | Env only | Env+bnAb     | 8 Signal       | 0.5873 | 1.00 |
| Epitope Mapping       | Epitope = C5.1_152-153 | MVA/Env  | MVA/Env+bnAb | 2 Signal       | 0.4444 | 1.00 |
| Epitope Mapping       | Epitope = C5.1_152-153 | MVA/Env  | MVA/Env+bnAb | 8 Signal       | 0.4921 | 1.00 |
| Epitope Mapping       | Epitope = C5.2_159-161 | Env only | Env+bnAb     | 2 Signal       | 0.7937 | 1.00 |
| Epitope Mapping       | Epitope = C5.2_159-161 | Env only | Env+bnAb     | 8 Signal       | 0.0317 | 1.00 |
| Epitope Mapping       | Epitope = C5.2_159-161 | MVA/Env  | MVA/Env+bnAb | 2 Signal       | 0.9206 | 1.00 |
| Epitope Mapping       | Epitope = C5.2_159-161 | MVA/Env  | MVA/Env+bnAb | 8 Signal       | 0.9683 | 1.00 |
| Neutralization        | Virus = SO032_A2.8-1   | Env only | Env+bnAb     | 14 point_ic50  | 0.0952 | 1.00 |
| Neutralization        | Virus = SO032_A2.8-1   | MVA/Env  | MVA/Env+bnAb | 14 point_ic50  | 0.5476 | 1.00 |
| Infected Cell Binding | Against CM235          | Env only | Env+bnAb     | 2 InfCM235MFI  | 0.7222 | 1.00 |
| Infected Cell Binding | Against CM235          | Env only | Env+bnAb     | 8 InfCM235MFI  | 0.6905 | 1.00 |
| Infected Cell Binding | Against CM235          | Env only | Env+bnAb     | 14 InfCM235MFI | 0.0317 | 1.00 |
| Infected Cell Binding | Against CM235          | MVA/Env  | MVA/Env+bnAb | 2 InfCM235MFI  | 0.1667 | 1.00 |
| Infected Cell Binding | Against CM235          | MVA/Env  | MVA/Env+bnAb | 8 InfCM235MFI  | 1.0000 | 1.00 |
| Infected Cell Binding | Against CM235          | MVA/Env  | MVA/Env+bnAb | 14 InfCM235MFI | 0.1508 | 1.00 |
| Infected Cell Binding | Against WITO           | Env only | Env+bnAb     | 2 InfWITOMFI   | 0.5238 | 1.00 |
| Infected Cell Binding | Against WITO           | Env only | Env+bnAb     | 8 InfWITOMFI   | 0.8889 | 1.00 |

|                       |                                      |          |              |    |                  |        |      |
|-----------------------|--------------------------------------|----------|--------------|----|------------------|--------|------|
| Infected Cell Binding | Against WITO                         | Env only | Env+bnAb     | 14 | InfWITOMFI       | 0.6905 | 1.00 |
| Infected Cell Binding | Against WITO                         | MVA/Env  | MVA/Env+bnAb | 2  | InfWITOMFI       | 1.0000 | 1.00 |
| Infected Cell Binding | Against WITO                         | MVA/Env  | MVA/Env+bnAb | 8  | InfWITOMFI       | 1.0000 | 1.00 |
| Infected Cell Binding | Against WITO                         | MVA/Env  | MVA/Env+bnAb | 14 | InfWITOMFI       | 0.4206 | 1.00 |
| ADCC                  | Peak activity                        | Env only | Env+bnAb     | 2  | Peak             | 0.9048 | 1.00 |
| ADCC                  | Peak activity                        | Env only | Env+bnAb     | 8  | Peak             | 0.6905 | 1.00 |
| ADCC                  | Peak activity                        | Env only | Env+bnAb     | 14 | Peak             | 0.3095 | 1.00 |
| ADCC                  | Peak activity                        | MVA/Env  | MVA/Env+bnAb | 2  | Peak             | 0.9762 | 1.00 |
| ADCC                  | Peak activity                        | MVA/Env  | MVA/Env+bnAb | 8  | Peak             | 0.5476 | 1.00 |
| ADCC                  | Peak activity                        | MVA/Env  | MVA/Env+bnAb | 14 | Peak             | 1.0000 | 1.00 |
| Avidity               | koff, Antigen = SHIV-1157ipd3N4 deli | Env only | Env+bnAb     | 8  | ant1_koff        | 1.0000 | 1.00 |
| Avidity               | koff, Antigen = SHIV-1157ipd3N4 deli | Env only | Env+bnAb     | 14 | ant1_koff        | 0.1508 | 1.00 |
| Avidity               | koff, Antigen = SHIV-1157ipd3N4 deli | MVA/Env  | MVA/Env+bnAb | 8  | ant1_koff        | 0.2222 | 1.00 |
| Avidity               | koff, Antigen = SHIV-1157ipd3N4 deli | MVA/Env  | MVA/Env+bnAb | 14 | ant1_koff        | 0.4206 | 1.00 |
| Avidity               | koff, Antigen = 1086D7gp120K160N     | Env only | Env+bnAb     | 8  | ant3_koff        | 0.4524 | 1.00 |
| Avidity               | koff, Antigen = 1086D7gp120K160N     | Env only | Env+bnAb     | 14 | ant3_koff        | 0.4206 | 1.00 |
| Avidity               | koff, Antigen = 1086D7gp120K160N     | MVA/Env  | MVA/Env+bnAb | 8  | ant3_koff        | 0.5476 | 1.00 |
| Avidity               | koff, Antigen = 1086D7gp120K160N     | MVA/Env  | MVA/Env+bnAb | 14 | ant3_koff        | 0.6905 | 1.00 |
| Avidity               | koff, Antigen = gp70-B.CaseA2 V1V2/  | Env only | Env+bnAb     | 14 | ant5_koff        | 0.7000 | 1.00 |
| Avidity               | koff, Antigen = gp70-B.CaseA2 V1V2/  | MVA/Env  | MVA/Env+bnAb | 8  | ant5_koff        | 0.6667 | 1.00 |
| Avidity               | koff, Antigen = gp70-B.CaseA2 V1V2/  | MVA/Env  | MVA/Env+bnAb | 14 | ant5_koff        | 1.0000 | 1.00 |
| Avidity               | koff, Antigen = gp70ConC_V3tags      | Env only | Env+bnAb     | 8  | ant6_koff        | 0.2222 | 1.00 |
| Avidity               | koff, Antigen = gp70ConC_V3tags      | Env only | Env+bnAb     | 14 | ant6_koff        | 0.8413 | 1.00 |
| Avidity               | koff, Antigen = gp70ConC_V3tags      | MVA/Env  | MVA/Env+bnAb | 8  | ant6_koff        | 0.9048 | 1.00 |
| Avidity               | koff, Antigen = gp70ConC_V3tags      | MVA/Env  | MVA/Env+bnAb | 14 | ant6_koff        | 0.0556 | 1.00 |
| Avidity               | koff, Antigen = C.1086C V1V2 Tag     | Env only | Env+bnAb     | 8  | ant4_koff        | 0.5000 | 1.00 |
| Avidity               | koff, Antigen = C.1086C V1V2 Tag     | Env only | Env+bnAb     | 14 | ant4_koff        | 0.0714 | 1.00 |
| Avidity               | koff, Antigen = C.1086C V1V2 Tag     | MVA/Env  | MVA/Env+bnAb | 8  | ant4_koff        | 1.0000 | 1.00 |
| Avidity               | koff, Antigen = C.1086C V1V2 Tag     | MVA/Env  | MVA/Env+bnAb | 14 | ant4_koff        | 0.9048 | 1.00 |
| Avidity               | koff, Antigen = Bio-V2-1086.C        | Env only | Env+bnAb     | 14 | ant7_koff        | 0.5000 | 1.00 |
| Avidity               | koff, Antigen = Bio-V2-1086.C        | MVA/Env  | MVA/Env+bnAb | 14 | ant7_koff        | 1.0000 | 1.00 |
| Avidity               | koff, Antigen = Bio-V3.C             | Env only | Env+bnAb     | 14 | ant8_koff        | 1.0000 | 1.00 |
| Avidity               | koff, Antigen = Bio-V3.C             | MVA/Env  | MVA/Env+bnAb | 14 | ant8_koff        | 0.5000 | 1.00 |
| Infected Cell Binding | Against 1086C                        | Env only | Env+bnAb     | 2  | Inf1086CPctFITCP | 0.4444 | 1.00 |

|                       |                                      |          |              |    |                  |        |      |
|-----------------------|--------------------------------------|----------|--------------|----|------------------|--------|------|
| Infected Cell Binding | Against 1086C                        | Env only | Env+bnAb     | 8  | Inf1086CPctFITCP | 0.8413 | 1.00 |
| Infected Cell Binding | Against 1086C                        | Env only | Env+bnAb     | 14 | Inf1086CPctFITCP | 1.0000 | 1.00 |
| Infected Cell Binding | Against 1086C                        | MVA/Env  | MVA/Env+bnAb | 2  | Inf1086CPctFITCP | 0.2460 | 1.00 |
| Infected Cell Binding | Against 1086C                        | MVA/Env  | MVA/Env+bnAb | 8  | Inf1086CPctFITCP | 0.8413 | 1.00 |
| Infected Cell Binding | Against 1086C                        | MVA/Env  | MVA/Env+bnAb | 14 | Inf1086CPctFITCP | 0.4206 | 1.00 |
| Infected Cell Binding | Against CM235                        | Env only | Env+bnAb     | 2  | InfCM235PctFITCP | 0.1349 | 1.00 |
| Infected Cell Binding | Against CM235                        | Env only | Env+bnAb     | 8  | InfCM235PctFITCP | 1.0000 | 1.00 |
| Infected Cell Binding | Against CM235                        | Env only | Env+bnAb     | 14 | InfCM235PctFITCP | 0.0317 | 1.00 |
| Infected Cell Binding | Against CM235                        | MVA/Env  | MVA/Env+bnAb | 2  | InfCM235PctFITCP | 0.4921 | 1.00 |
| Infected Cell Binding | Against CM235                        | MVA/Env  | MVA/Env+bnAb | 8  | InfCM235PctFITCP | 1.0000 | 1.00 |
| Infected Cell Binding | Against CM235                        | MVA/Env  | MVA/Env+bnAb | 14 | InfCM235PctFITCP | 0.2222 | 1.00 |
| Infected Cell Binding | Against WITO                         | Env only | Env+bnAb     | 2  | InfWITOPctFITCPo | 0.3889 | 1.00 |
| Infected Cell Binding | Against WITO                         | Env only | Env+bnAb     | 8  | InfWITOPctFITCPo | 1.0000 | 1.00 |
| Infected Cell Binding | Against WITO                         | Env only | Env+bnAb     | 14 | InfWITOPctFITCPo | 1.0000 | 1.00 |
| Infected Cell Binding | Against WITO                         | MVA/Env  | MVA/Env+bnAb | 2  | InfWITOPctFITCPo | 0.3889 | 1.00 |
| Infected Cell Binding | Against WITO                         | MVA/Env  | MVA/Env+bnAb | 8  | InfWITOPctFITCPo | 0.8413 | 1.00 |
| Infected Cell Binding | Against WITO                         | MVA/Env  | MVA/Env+bnAb | 14 | InfWITOPctFITCPo | 0.4206 | 1.00 |
| Avidity               | avidity, Antigen = SHIV-1157ipd3N4 c | Env only | Env+bnAb     | 8  | ant1_avidity     | 0.5476 | 1.00 |
| Avidity               | avidity, Antigen = SHIV-1157ipd3N4 c | Env only | Env+bnAb     | 14 | ant1_avidity     | 0.3095 | 1.00 |
| Avidity               | avidity, Antigen = SHIV-1157ipd3N4 c | MVA/Env  | MVA/Env+bnAb | 8  | ant1_avidity     | 0.5476 | 1.00 |
| Avidity               | avidity, Antigen = SHIV-1157ipd3N4 c | MVA/Env  | MVA/Env+bnAb | 14 | ant1_avidity     | 0.6905 | 1.00 |
| Avidity               | avidity, Antigen = 1086D7gp120K160   | Env only | Env+bnAb     | 8  | ant3_avidity     | 0.5476 | 1.00 |
| Avidity               | avidity, Antigen = 1086D7gp120K160   | Env only | Env+bnAb     | 14 | ant3_avidity     | 0.4206 | 1.00 |
| Avidity               | avidity, Antigen = 1086D7gp120K160   | MVA/Env  | MVA/Env+bnAb | 8  | ant3_avidity     | 0.8413 | 1.00 |
| Avidity               | avidity, Antigen = 1086D7gp120K160   | MVA/Env  | MVA/Env+bnAb | 14 | ant3_avidity     | 0.6905 | 1.00 |
| Avidity               | avidity, Antigen = gp70-B.CaseA2 V1\ | Env only | Env+bnAb     | 14 | ant5_avidity     | 1.0000 | 1.00 |
| Avidity               | avidity, Antigen = gp70-B.CaseA2 V1\ | MVA/Env  | MVA/Env+bnAb | 8  | ant5_avidity     | 0.6667 | 1.00 |
| Avidity               | avidity, Antigen = gp70-B.CaseA2 V1\ | MVA/Env  | MVA/Env+bnAb | 14 | ant5_avidity     | 1.0000 | 1.00 |
| Avidity               | avidity, Antigen = gp70ConC_V3tags   | Env only | Env+bnAb     | 8  | ant6_avidity     | 0.2222 | 1.00 |
| Avidity               | avidity, Antigen = gp70ConC_V3tags   | Env only | Env+bnAb     | 14 | ant6_avidity     | 0.8413 | 1.00 |
| Avidity               | avidity, Antigen = gp70ConC_V3tags   | MVA/Env  | MVA/Env+bnAb | 8  | ant6_avidity     | 0.9048 | 1.00 |
| Avidity               | avidity, Antigen = gp70ConC_V3tags   | MVA/Env  | MVA/Env+bnAb | 14 | ant6_avidity     | 0.0556 | 1.00 |
| Avidity               | avidity, Antigen = C.1086C V1V2 Tag  | Env only | Env+bnAb     | 8  | ant4_avidity     | 0.5000 | 1.00 |
| Avidity               | avidity, Antigen = C.1086C V1V2 Tag  | Env only | Env+bnAb     | 14 | ant4_avidity     | 0.2500 | 1.00 |

|         |                                     |          |              |    |              |        |      |
|---------|-------------------------------------|----------|--------------|----|--------------|--------|------|
| Avidity | avidity, Antigen = C.1086C V1V2 Tag | MVA/Env  | MVA/Env+bnAb | 8  | ant4_avidity | 0.8000 | 1.00 |
| Avidity | avidity, Antigen = C.1086C V1V2 Tag | MVA/Env  | MVA/Env+bnAb | 14 | ant4_avidity | 0.9048 | 1.00 |
| Avidity | avidity, Antigen = Bio-V2-1086.C    | Env only | Env+bnAb     | 14 | ant7_avidity | 0.5000 | 1.00 |
| Avidity | avidity, Antigen = Bio-V2-1086.C    | MVA/Env  | MVA/Env+bnAb | 14 | ant7_avidity | 0.8000 | 1.00 |
| Avidity | avidity, Antigen = Bio-V3.C         | Env only | Env+bnAb     | 14 | ant8_avidity | 0.4000 | 1.00 |
| Avidity | avidity, Antigen = Bio-V3.C         | MVA/Env  | MVA/Env+bnAb | 14 | ant8_avidity | 0.4000 | 1.00 |

<sup>§</sup> Unadjusted p values are Wilcoxon rank sum tests exact p-values. FDR\_p values are the p values adjusted for multiple comparisons using the Benjamini–Hochberg (BH) procedure.

**Table S2.** Statistical results<sup>§</sup> for all comparisons between paired groups with Env only versus MVA/Env immunogens.

| Assay                 | Note                           | group1   | group2       | week | variable         | unadjusted.p | FDR_p  |
|-----------------------|--------------------------------|----------|--------------|------|------------------|--------------|--------|
| BAMA                  | Antigen = bama_1086c_gp140     | Env only | MVA/Env      | 2    | bama_1086c_gp140 | 0.1429       | 0.9422 |
| BAMA                  | Antigen = bama_1086c_gp140     | Env only | MVA/Env      | 8    | bama_1086c_gp140 | 0.1508       | 0.9422 |
| BAMA                  | Antigen = bama_1086c_gp140     | Env only | MVA/Env      | 14   | bama_1086c_gp140 | 1.0000       | 1.0000 |
| BAMA                  | Antigen = bama_1086c_gp140     | Env+bnAb | MVA/Env+bnAb | 2    | bama_1086c_gp140 | 1.0000       | 1.0000 |
| BAMA                  | Antigen = bama_1086c_gp140     | Env+bnAb | MVA/Env+bnAb | 8    | bama_1086c_gp140 | 0.8413       | 1.0000 |
| BAMA                  | Antigen = bama_1086c_gp140     | Env+bnAb | MVA/Env+bnAb | 14   | bama_1086c_gp140 | 0.4206       | 0.9693 |
| Neutralization        | Virus = MW965.26.LucR.T2A.ecto | Env only | MVA/Env      | 2    | point_ic50       | 1.0000       | 1.0000 |
| Neutralization        | Virus = MW965.26.LucR.T2A.ecto | Env only | MVA/Env      | 8    | point_ic50       | 0.5476       | 1.0000 |
| Neutralization        | Virus = MW965.26.LucR.T2A.ecto | Env only | MVA/Env      | 14   | point_ic50       | 0.6905       | 1.0000 |
| Neutralization        | Virus = MW965.26.LucR.T2A.ecto | Env+bnAb | MVA/Env+bnAb | 2    | point_ic50       | 0.0635       | 0.8833 |
| Neutralization        | Virus = MW965.26.LucR.T2A.ecto | Env+bnAb | MVA/Env+bnAb | 8    | point_ic50       | 0.3095       | 0.9422 |
| Neutralization        | Virus = MW965.26.LucR.T2A.ecto | Env+bnAb | MVA/Env+bnAb | 14   | point_ic50       | 0.2222       | 0.9422 |
| Infected Cell Binding | Against 1086C                  | Env only | MVA/Env      | 2    | Inf1086CMFI      | 0.8286       | 1.0000 |
| Infected Cell Binding | Against 1086C                  | Env only | MVA/Env      | 8    | Inf1086CMFI      | 0.3095       | 0.9422 |
| Infected Cell Binding | Against 1086C                  | Env only | MVA/Env      | 14   | Inf1086CMFI      | 0.6905       | 1.0000 |
| Infected Cell Binding | Against 1086C                  | Env+bnAb | MVA/Env+bnAb | 2    | Inf1086CMFI      | 0.3810       | 0.9693 |
| Infected Cell Binding | Against 1086C                  | Env+bnAb | MVA/Env+bnAb | 8    | Inf1086CMFI      | 0.8413       | 1.0000 |
| Infected Cell Binding | Against 1086C                  | Env+bnAb | MVA/Env+bnAb | 14   | Inf1086CMFI      | 0.3333       | 0.9422 |
| ADCC                  | Titer                          | Env only | MVA/Env      | 2    | Titer            | 1.0000       | 1.0000 |
| ADCC                  | Titer                          | Env only | MVA/Env      | 8    | Titer            | 0.8413       | 1.0000 |
| ADCC                  | Titer                          | Env only | MVA/Env      | 14   | Titer            | 0.4206       | 0.9693 |
| ADCC                  | Titer                          | Env+bnAb | MVA/Env+bnAb | 2    | Titer            | 1.0000       | 1.0000 |
| ADCC                  | Titer                          | Env+bnAb | MVA/Env+bnAb | 8    | Titer            | 1.0000       | 1.0000 |

|               |                                  |          |              |                      |        |        |
|---------------|----------------------------------|----------|--------------|----------------------|--------|--------|
| ADCC          | Titer                            | Env+bnAb | MVA/Env+bnAb | 14 Titer             | 1.0000 | 1.0000 |
| sCD4 Blocking | Percent CD4 Blocking             | Env only | MVA/Env      | 1 Percentage_CD4_B   | 1.0000 | 1.0000 |
| sCD4 Blocking | Percent CD4 Blocking             | Env only | MVA/Env      | 2 Percentage_CD4_B   | 1.0000 | 1.0000 |
| sCD4 Blocking | Percent CD4 Blocking             | Env only | MVA/Env      | 8 Percentage_CD4_B   | 0.2222 | 0.9422 |
| sCD4 Blocking | Percent CD4 Blocking             | Env only | MVA/Env      | 14 Percentage_CD4_B  | 0.3095 | 0.9422 |
| sCD4 Blocking | Percent CD4 Blocking             | Env+bnAb | MVA/Env+bnAb | 1 Percentage_CD4_B   | 1.0000 | 1.0000 |
| sCD4 Blocking | Percent CD4 Blocking             | Env+bnAb | MVA/Env+bnAb | 2 Percentage_CD4_B   | 1.0000 | 1.0000 |
| sCD4 Blocking | Percent CD4 Blocking             | Env+bnAb | MVA/Env+bnAb | 8 Percentage_CD4_B   | 0.0317 | 0.8413 |
| sCD4 Blocking | Percent CD4 Blocking             | Env+bnAb | MVA/Env+bnAb | 14 Percentage_CD4_B  | 1.0000 | 1.0000 |
| Elisa         | Antigen = 1086.c.gp120 Human IgG | Env+bnAb | MVA/Env+bnAb | 0.1 conc_binding_abs | 0.3095 | 0.9422 |
| Elisa         | Antigen = 1086.c.gp120 Human IgG | Env+bnAb | MVA/Env+bnAb | 0.4 conc_binding_abs | 0.0079 | 0.8413 |
| Elisa         | Antigen = 1086.c.gp120 Human IgG | Env+bnAb | MVA/Env+bnAb | 1 conc_binding_abs   | 0.1111 | 0.9319 |
| Elisa         | Antigen = 1086.c.gp120 Human IgG | Env+bnAb | MVA/Env+bnAb | 2 conc_binding_abs   | 0.7222 | 1.0000 |
| Elisa         | Antigen = 1086.c.gp120 NHP IgG   | Env only | MVA/Env      | 2 conc_binding_abs   | 0.1143 | 0.9319 |
| Elisa         | Antigen = 1086.c.gp120 NHP IgG   | Env only | MVA/Env      | 8 conc_binding_abs   | 0.6905 | 1.0000 |
| Elisa         | Antigen = 1086.c.gp120 NHP IgG   | Env only | MVA/Env      | 14 conc_binding_abs  | 0.0079 | 0.8413 |
| Elisa         | Antigen = 1086.c.gp120 NHP IgG   | Env+bnAb | MVA/Env+bnAb | 2 conc_binding_abs   | 0.5476 | 1.0000 |
| Elisa         | Antigen = 1086.c.gp120 NHP IgG   | Env+bnAb | MVA/Env+bnAb | 8 conc_binding_abs   | 0.5476 | 1.0000 |
| Elisa         | Antigen = 1086.c.gp120 NHP IgG   | Env+bnAb | MVA/Env+bnAb | 14 conc_binding_abs  | 1.0000 | 1.0000 |
| BAMA          | Antigen = gp140_mean             | Env only | MVA/Env      | 2 gp140_mean         | 0.3143 | 0.9422 |
| BAMA          | Antigen = gp140_mean             | Env only | MVA/Env      | 8 gp140_mean         | 0.2222 | 0.9422 |
| BAMA          | Antigen = gp140_mean             | Env only | MVA/Env      | 14 gp140_mean        | 0.6905 | 1.0000 |
| BAMA          | Antigen = gp140_mean             | Env+bnAb | MVA/Env+bnAb | 2 gp140_mean         | 0.7460 | 1.0000 |
| BAMA          | Antigen = gp140_mean             | Env+bnAb | MVA/Env+bnAb | 8 gp140_mean         | 1.0000 | 1.0000 |
| BAMA          | Antigen = gp140_mean             | Env+bnAb | MVA/Env+bnAb | 14 gp140_mean        | 0.8413 | 1.0000 |
| BAMA          | Antigen = gp120_mean             | Env only | MVA/Env      | 2 gp120_mean         | 0.2000 | 0.9422 |
| BAMA          | Antigen = gp120_mean             | Env only | MVA/Env      | 8 gp120_mean         | 0.2222 | 0.9422 |
| BAMA          | Antigen = gp120_mean             | Env only | MVA/Env      | 14 gp120_mean        | 0.3095 | 0.9422 |
| BAMA          | Antigen = gp120_mean             | Env+bnAb | MVA/Env+bnAb | 2 gp120_mean         | 0.8413 | 1.0000 |
| BAMA          | Antigen = gp120_mean             | Env+bnAb | MVA/Env+bnAb | 8 gp120_mean         | 1.0000 | 1.0000 |
| BAMA          | Antigen = gp120_mean             | Env+bnAb | MVA/Env+bnAb | 14 gp120_mean        | 0.8413 | 1.0000 |
| BAMA          | Antigen = V1V2_mean              | Env only | MVA/Env      | 2 V1V2_mean          | 0.6857 | 1.0000 |
| BAMA          | Antigen = V1V2_mean              | Env only | MVA/Env      | 8 V1V2_mean          | 0.2222 | 0.9422 |
| BAMA          | Antigen = V1V2_mean              | Env only | MVA/Env      | 14 V1V2_mean         | 0.6905 | 1.0000 |



|                 |                      |          |              |              |        |        |
|-----------------|----------------------|----------|--------------|--------------|--------|--------|
| BAMA            | Antigen = V1V2_mean  | Env+bnAb | MVA/Env+bnAb | 2 V1V2_mean  | 1.0000 | 1.0000 |
| BAMA            | Antigen = V1V2_mean  | Env+bnAb | MVA/Env+bnAb | 8 V1V2_mean  | 1.0000 | 1.0000 |
| BAMA            | Antigen = V1V2_mean  | Env+bnAb | MVA/Env+bnAb | 14 V1V2_mean | 0.8413 | 1.0000 |
| BAMA            | Antigen = V3_mean    | Env only | MVA/Env      | 2 V3_mean    | 0.0286 | 0.8413 |
| BAMA            | Antigen = V3_mean    | Env only | MVA/Env      | 8 V3_mean    | 0.0952 | 0.8833 |
| BAMA            | Antigen = V3_mean    | Env only | MVA/Env      | 14 V3_mean   | 0.6905 | 1.0000 |
| BAMA            | Antigen = V3_mean    | Env+bnAb | MVA/Env+bnAb | 2 V3_mean    | 1.0000 | 1.0000 |
| BAMA            | Antigen = V3_mean    | Env+bnAb | MVA/Env+bnAb | 8 V3_mean    | 0.8413 | 1.0000 |
| BAMA            | Antigen = V3_mean    | Env+bnAb | MVA/Env+bnAb | 14 V3_mean   | 0.4206 | 0.9693 |
| BAMA            | Antigen = bio_v2_b   | Env only | MVA/Env      | 2 bio_v2_b   | 0.0286 | 0.8413 |
| BAMA            | Antigen = bio_v2_b   | Env only | MVA/Env      | 8 bio_v2_b   | 0.6905 | 1.0000 |
| BAMA            | Antigen = bio_v2_b   | Env only | MVA/Env      | 14 bio_v2_b  | 1.0000 | 1.0000 |
| BAMA            | Antigen = bio_v2_b   | Env+bnAb | MVA/Env+bnAb | 2 bio_v2_b   | 1.0000 | 1.0000 |
| BAMA            | Antigen = bio_v2_b   | Env+bnAb | MVA/Env+bnAb | 8 bio_v2_b   | 0.3095 | 0.9422 |
| BAMA            | Antigen = bio_v2_b   | Env+bnAb | MVA/Env+bnAb | 14 bio_v2_b  | 0.2222 | 0.9422 |
| BAMA            | Antigen = c5_c       | Env only | MVA/Env      | 2 c5_c       | 0.4286 | 0.9770 |
| BAMA            | Antigen = c5_c       | Env only | MVA/Env      | 8 c5_c       | 0.3095 | 0.9422 |
| BAMA            | Antigen = c5_c       | Env only | MVA/Env      | 14 c5_c      | 0.6905 | 1.0000 |
| BAMA            | Antigen = c5_c       | Env+bnAb | MVA/Env+bnAb | 2 c5_c       | 1.0000 | 1.0000 |
| BAMA            | Antigen = c5_c       | Env+bnAb | MVA/Env+bnAb | 8 c5_c       | 0.4206 | 0.9693 |
| BAMA            | Antigen = c5_c       | Env+bnAb | MVA/Env+bnAb | 14 c5_c      | 0.8413 | 1.0000 |
| BAMA            | Antigen = c1_biotin  | Env only | MVA/Env      | 2 c1_biotin  | 0.3429 | 0.9564 |
| BAMA            | Antigen = c1_biotin  | Env only | MVA/Env      | 8 c1_biotin  | 0.4206 | 0.9693 |
| BAMA            | Antigen = c1_biotin  | Env only | MVA/Env      | 14 c1_biotin | 0.8413 | 1.0000 |
| BAMA            | Antigen = c1_biotin  | Env+bnAb | MVA/Env+bnAb | 2 c1_biotin  | 0.4603 | 1.0000 |
| BAMA            | Antigen = c1_biotin  | Env+bnAb | MVA/Env+bnAb | 8 c1_biotin  | 0.6905 | 1.0000 |
| BAMA            | Antigen = c1_biotin  | Env+bnAb | MVA/Env+bnAb | 14 c1_biotin | 0.6905 | 1.0000 |
| Epitope Mapping | Epitope = C1.1_34-36 | Env only | MVA/Env      | 2 Signal     | 1.0000 | 1.0000 |
| Epitope Mapping | Epitope = C1.1_34-36 | Env only | MVA/Env      | 8 Signal     | 0.0556 | 0.8833 |
| Epitope Mapping | Epitope = C1.1_34-36 | Env+bnAb | MVA/Env+bnAb | 2 Signal     | 0.1667 | 0.9422 |
| Epitope Mapping | Epitope = C1.1_34-36 | Env+bnAb | MVA/Env+bnAb | 8 Signal     | 0.6349 | 1.0000 |
| Epitope Mapping | Epitope = V2_53-55   | Env only | MVA/Env      | 2 Signal     | 0.6571 | 1.0000 |
| Epitope Mapping | Epitope = V2_53-55   | Env only | MVA/Env      | 8 Signal     | 0.0952 | 0.8833 |
| Epitope Mapping | Epitope = V2_53-55   | Env+bnAb | MVA/Env+bnAb | 2 Signal     | 0.4444 | 0.9918 |

|                 |                        |          |              |          |        |        |
|-----------------|------------------------|----------|--------------|----------|--------|--------|
| Epitope Mapping | Epitope = V2_53-55     | Env+bnAb | MVA/Env+bnAb | 8 Signal | 0.6349 | 1.0000 |
| Epitope Mapping | Epitope = C2.1_65-67   | Env only | MVA/Env      | 2 Signal | 1.0000 | 1.0000 |
| Epitope Mapping | Epitope = C2.1_65-67   | Env only | MVA/Env      | 8 Signal | 1.0000 | 1.0000 |
| Epitope Mapping | Epitope = C2.1_65-67   | Env+bnAb | MVA/Env+bnAb | 2 Signal | 1.0000 | 1.0000 |
| Epitope Mapping | Epitope = C2.1_65-67   | Env+bnAb | MVA/Env+bnAb | 8 Signal | 1.0000 | 1.0000 |
| Epitope Mapping | Epitope = C2.2_70-73   | Env only | MVA/Env      | 2 Signal | 0.7143 | 1.0000 |
| Epitope Mapping | Epitope = C2.2_70-73   | Env only | MVA/Env      | 8 Signal | 0.2143 | 0.9422 |
| Epitope Mapping | Epitope = C2.2_70-73   | Env+bnAb | MVA/Env+bnAb | 2 Signal | 0.7222 | 1.0000 |
| Epitope Mapping | Epitope = C2.2_70-73   | Env+bnAb | MVA/Env+bnAb | 8 Signal | 0.2857 | 0.9422 |
| Epitope Mapping | Epitope = C2.4_88-89   | Env only | MVA/Env      | 2 Signal | 1.0000 | 1.0000 |
| Epitope Mapping | Epitope = C2.4_88-89   | Env only | MVA/Env      | 8 Signal | 1.0000 | 1.0000 |
| Epitope Mapping | Epitope = C2.4_88-89   | Env+bnAb | MVA/Env+bnAb | 2 Signal | 1.0000 | 1.0000 |
| Epitope Mapping | Epitope = C2.4_88-89   | Env+bnAb | MVA/Env+bnAb | 8 Signal | 1.0000 | 1.0000 |
| Epitope Mapping | Epitope = V3_99-102    | Env only | MVA/Env      | 2 Signal | 0.7714 | 1.0000 |
| Epitope Mapping | Epitope = V3_99-102    | Env only | MVA/Env      | 8 Signal | 0.0952 | 0.8833 |
| Epitope Mapping | Epitope = V3_99-102    | Env+bnAb | MVA/Env+bnAb | 2 Signal | 0.3333 | 0.9422 |
| Epitope Mapping | Epitope = V3_99-102    | Env+bnAb | MVA/Env+bnAb | 8 Signal | 0.3095 | 0.9422 |
| Epitope Mapping | Epitope = C3_112-114   | Env only | MVA/Env      | 2 Signal | 1.0000 | 1.0000 |
| Epitope Mapping | Epitope = C3_112-114   | Env only | MVA/Env      | 8 Signal | 1.0000 | 1.0000 |
| Epitope Mapping | Epitope = C3_112-114   | Env+bnAb | MVA/Env+bnAb | 2 Signal | 1.0000 | 1.0000 |
| Epitope Mapping | Epitope = C3_112-114   | Env+bnAb | MVA/Env+bnAb | 8 Signal | 0.6905 | 1.0000 |
| Epitope Mapping | Epitope = C3.2_116-117 | Env only | MVA/Env      | 2 Signal | 1.0000 | 1.0000 |
| Epitope Mapping | Epitope = C3.2_116-117 | Env only | MVA/Env      | 8 Signal | 1.0000 | 1.0000 |
| Epitope Mapping | Epitope = C3.2_116-117 | Env+bnAb | MVA/Env+bnAb | 2 Signal | 1.0000 | 1.0000 |
| Epitope Mapping | Epitope = C3.2_116-117 | Env+bnAb | MVA/Env+bnAb | 8 Signal | 0.0476 | 0.8833 |
| Epitope Mapping | Epitope = V5_146-149   | Env only | MVA/Env      | 2 Signal | 1.0000 | 1.0000 |
| Epitope Mapping | Epitope = V5_146-149   | Env only | MVA/Env      | 8 Signal | 0.7460 | 1.0000 |
| Epitope Mapping | Epitope = V5_146-149   | Env+bnAb | MVA/Env+bnAb | 2 Signal | 0.7222 | 1.0000 |
| Epitope Mapping | Epitope = V5_146-149   | Env+bnAb | MVA/Env+bnAb | 8 Signal | 0.3095 | 0.9422 |
| Epitope Mapping | Epitope = C5.1_152-153 | Env only | MVA/Env      | 2 Signal | 1.0000 | 1.0000 |
| Epitope Mapping | Epitope = C5.1_152-153 | Env only | MVA/Env      | 8 Signal | 0.8333 | 1.0000 |
| Epitope Mapping | Epitope = C5.1_152-153 | Env+bnAb | MVA/Env+bnAb | 2 Signal | 0.7222 | 1.0000 |
| Epitope Mapping | Epitope = C5.1_152-153 | Env+bnAb | MVA/Env+bnAb | 8 Signal | 0.3016 | 0.9422 |
| Epitope Mapping | Epitope = C5.2_159-161 | Env only | MVA/Env      | 2 Signal | 0.3143 | 0.9422 |

|                       |                                      |          |              |                |        |        |
|-----------------------|--------------------------------------|----------|--------------|----------------|--------|--------|
| Epitope Mapping       | Epitope = C5.2_159-161               | Env only | MVA/Env      | 8 Signal       | 0.6429 | 1.0000 |
| Epitope Mapping       | Epitope = C5.2_159-161               | Env+bnAb | MVA/Env+bnAb | 2 Signal       | 0.4444 | 0.9918 |
| Epitope Mapping       | Epitope = C5.2_159-161               | Env+bnAb | MVA/Env+bnAb | 8 Signal       | 0.6905 | 1.0000 |
| Neutralization        | Virus = SO032_A2.8-1                 | Env only | MVA/Env      | 14 point_ic50  | 0.0952 | 0.8833 |
| Neutralization        | Virus = SO032_A2.8-1                 | Env+bnAb | MVA/Env+bnAb | 14 point_ic50  | 0.4206 | 0.9693 |
| Infected Cell Binding | Against CM235                        | Env only | MVA/Env      | 2 InfCM235MFI  | 1.0000 | 1.0000 |
| Infected Cell Binding | Against CM235                        | Env only | MVA/Env      | 8 InfCM235MFI  | 0.3095 | 0.9422 |
| Infected Cell Binding | Against CM235                        | Env only | MVA/Env      | 14 InfCM235MFI | 0.0952 | 0.8833 |
| Infected Cell Binding | Against CM235                        | Env+bnAb | MVA/Env+bnAb | 2 InfCM235MFI  | 0.1667 | 0.9422 |
| Infected Cell Binding | Against CM235                        | Env+bnAb | MVA/Env+bnAb | 8 InfCM235MFI  | 0.0952 | 0.8833 |
| Infected Cell Binding | Against CM235                        | Env+bnAb | MVA/Env+bnAb | 14 InfCM235MFI | 0.0317 | 0.8413 |
| Infected Cell Binding | Against WITO                         | Env only | MVA/Env      | 2 InfWITOMFI   | 0.8286 | 1.0000 |
| Infected Cell Binding | Against WITO                         | Env only | MVA/Env      | 8 InfWITOMFI   | 0.2222 | 0.9422 |
| Infected Cell Binding | Against WITO                         | Env only | MVA/Env      | 14 InfWITOMFI  | 0.5476 | 1.0000 |
| Infected Cell Binding | Against WITO                         | Env+bnAb | MVA/Env+bnAb | 2 InfWITOMFI   | 0.2857 | 0.9422 |
| Infected Cell Binding | Against WITO                         | Env+bnAb | MVA/Env+bnAb | 8 InfWITOMFI   | 0.8413 | 1.0000 |
| Infected Cell Binding | Against WITO                         | Env+bnAb | MVA/Env+bnAb | 14 InfWITOMFI  | 1.0000 | 1.0000 |
| ADCC                  | Peak acitivity                       | Env only | MVA/Env      | 2 Peak         | 0.6571 | 1.0000 |
| ADCC                  | Peak acitivity                       | Env only | MVA/Env      | 8 Peak         | 0.5476 | 1.0000 |
| ADCC                  | Peak acitivity                       | Env only | MVA/Env      | 14 Peak        | 0.3095 | 0.9422 |
| ADCC                  | Peak acitivity                       | Env+bnAb | MVA/Env+bnAb | 2 Peak         | 0.4603 | 1.0000 |
| ADCC                  | Peak acitivity                       | Env+bnAb | MVA/Env+bnAb | 8 Peak         | 0.2222 | 0.9422 |
| ADCC                  | Peak acitivity                       | Env+bnAb | MVA/Env+bnAb | 14 Peak        | 0.2222 | 0.9422 |
| Avidity               | koff, Antigen = SHIV-1157ipd3N4 deli | Env only | MVA/Env      | 8 ant1_koff    | 0.6905 | 1.0000 |
| Avidity               | koff, Antigen = SHIV-1157ipd3N4 deli | Env only | MVA/Env      | 14 ant1_koff   | 0.3095 | 0.9422 |
| Avidity               | koff, Antigen = SHIV-1157ipd3N4 deli | Env+bnAb | MVA/Env+bnAb | 8 ant1_koff    | 0.0952 | 0.8833 |
| Avidity               | koff, Antigen = SHIV-1157ipd3N4 deli | Env+bnAb | MVA/Env+bnAb | 14 ant1_koff   | 0.2222 | 0.9422 |
| Avidity               | koff, Antigen = 1086D7gp120K160N     | Env only | MVA/Env      | 8 ant3_koff    | 1.0000 | 1.0000 |
| Avidity               | koff, Antigen = 1086D7gp120K160N     | Env only | MVA/Env      | 14 ant3_koff   | 1.0000 | 1.0000 |
| Avidity               | koff, Antigen = 1086D7gp120K160N     | Env+bnAb | MVA/Env+bnAb | 8 ant3_koff    | 0.4206 | 0.9693 |
| Avidity               | koff, Antigen = 1086D7gp120K160N     | Env+bnAb | MVA/Env+bnAb | 14 ant3_koff   | 0.5476 | 1.0000 |
| Avidity               | koff, Antigen = gp70-B.CaseA2 V1V2/  | Env only | MVA/Env      | 14 ant5_koff   | 1.0000 | 1.0000 |
| Avidity               | koff, Antigen = gp70-B.CaseA2 V1V2/  | Env+bnAb | MVA/Env+bnAb | 8 ant5_koff    | 0.3333 | 0.9422 |
| Avidity               | koff, Antigen = gp70-B.CaseA2 V1V2/  | Env+bnAb | MVA/Env+bnAb | 14 ant5_koff   | 0.4000 | 0.9693 |

|                       |                                      |          |              |                     |        |        |
|-----------------------|--------------------------------------|----------|--------------|---------------------|--------|--------|
| Avidity               | koff, Antigen = gp70ConC_V3tags      | Env only | MVA/Env      | 8 ant6_koff         | 0.0317 | 0.8413 |
| Avidity               | koff, Antigen = gp70ConC_V3tags      | Env only | MVA/Env      | 14 ant6_koff        | 0.2222 | 0.9422 |
| Avidity               | koff, Antigen = gp70ConC_V3tags      | Env+bnAb | MVA/Env+bnAb | 8 ant6_koff         | 0.7302 | 1.0000 |
| Avidity               | koff, Antigen = gp70ConC_V3tags      | Env+bnAb | MVA/Env+bnAb | 14 ant6_koff        | 0.3095 | 0.9422 |
| Avidity               | koff, Antigen = C.1086C V1V2 Tag     | Env only | MVA/Env      | 8 ant4_koff         | 0.5000 | 1.0000 |
| Avidity               | koff, Antigen = C.1086C V1V2 Tag     | Env only | MVA/Env      | 14 ant4_koff        | 0.4000 | 0.9693 |
| Avidity               | koff, Antigen = C.1086C V1V2 Tag     | Env+bnAb | MVA/Env+bnAb | 8 ant4_koff         | 1.0000 | 1.0000 |
| Avidity               | koff, Antigen = C.1086C V1V2 Tag     | Env+bnAb | MVA/Env+bnAb | 14 ant4_koff        | 0.8413 | 1.0000 |
| Avidity               | koff, Antigen = Bio-V2-1086.C        | Env only | MVA/Env      | 14 ant7_koff        | 0.6667 | 1.0000 |
| Avidity               | koff, Antigen = Bio-V2-1086.C        | Env+bnAb | MVA/Env+bnAb | 14 ant7_koff        | 0.1000 | 0.8833 |
| Avidity               | koff, Antigen = Bio-V3.C             | Env only | MVA/Env      | 14 ant8_koff        | 0.2000 | 0.9422 |
| Avidity               | koff, Antigen = Bio-V3.C             | Env+bnAb | MVA/Env+bnAb | 14 ant8_koff        | 0.1000 | 0.8833 |
| Infected Cell Binding | Against 1086C                        | Env only | MVA/Env      | 2 Inf1086CPctFITCP  | 0.1429 | 0.9422 |
| Infected Cell Binding | Against 1086C                        | Env only | MVA/Env      | 8 Inf1086CPctFITCP  | 0.3333 | 0.9422 |
| Infected Cell Binding | Against 1086C                        | Env only | MVA/Env      | 14 Inf1086CPctFITCP | 0.5476 | 1.0000 |
| Infected Cell Binding | Against 1086C                        | Env+bnAb | MVA/Env+bnAb | 2 Inf1086CPctFITCP  | 0.6825 | 1.0000 |
| Infected Cell Binding | Against 1086C                        | Env+bnAb | MVA/Env+bnAb | 8 Inf1086CPctFITCP  | 0.6905 | 1.0000 |
| Infected Cell Binding | Against 1086C                        | Env+bnAb | MVA/Env+bnAb | 14 Inf1086CPctFITCP | 0.2222 | 0.9422 |
| Infected Cell Binding | Against CM235                        | Env only | MVA/Env      | 2 InfCM235PctFITCP  | 0.3143 | 0.9422 |
| Infected Cell Binding | Against CM235                        | Env only | MVA/Env      | 8 InfCM235PctFITCP  | 0.4206 | 0.9693 |
| Infected Cell Binding | Against CM235                        | Env only | MVA/Env      | 14 InfCM235PctFITCP | 0.0952 | 0.8833 |
| Infected Cell Binding | Against CM235                        | Env+bnAb | MVA/Env+bnAb | 2 InfCM235PctFITCP  | 0.2857 | 0.9422 |
| Infected Cell Binding | Against CM235                        | Env+bnAb | MVA/Env+bnAb | 8 InfCM235PctFITCP  | 0.0952 | 0.8833 |
| Infected Cell Binding | Against CM235                        | Env+bnAb | MVA/Env+bnAb | 14 InfCM235PctFITCP | 0.0317 | 0.8413 |
| Infected Cell Binding | Against WITO                         | Env only | MVA/Env      | 2 InfWITOPctFITCPo  | 0.9714 | 1.0000 |
| Infected Cell Binding | Against WITO                         | Env only | MVA/Env      | 8 InfWITOPctFITCPo  | 0.3095 | 0.9422 |
| Infected Cell Binding | Against WITO                         | Env only | MVA/Env      | 14 InfWITOPctFITCPo | 0.5476 | 1.0000 |
| Infected Cell Binding | Against WITO                         | Env+bnAb | MVA/Env+bnAb | 2 InfWITOPctFITCPo  | 0.4921 | 1.0000 |
| Infected Cell Binding | Against WITO                         | Env+bnAb | MVA/Env+bnAb | 8 InfWITOPctFITCPo  | 0.8413 | 1.0000 |
| Infected Cell Binding | Against WITO                         | Env+bnAb | MVA/Env+bnAb | 14 InfWITOPctFITCPo | 1.0000 | 1.0000 |
| Avidity               | avidity, Antigen = SHIV-1157ipd3N4 c | Env only | MVA/Env      | 8 ant1_avidity      | 0.8413 | 1.0000 |
| Avidity               | avidity, Antigen = SHIV-1157ipd3N4 c | Env only | MVA/Env      | 14 ant1_avidity     | 0.5476 | 1.0000 |
| Avidity               | avidity, Antigen = SHIV-1157ipd3N4 c | Env+bnAb | MVA/Env+bnAb | 8 ant1_avidity      | 0.3095 | 0.9422 |
| Avidity               | avidity, Antigen = SHIV-1157ipd3N4 c | Env+bnAb | MVA/Env+bnAb | 14 ant1_avidity     | 0.0952 | 0.8833 |

|         |                                               |              |    |              |        |        |
|---------|-----------------------------------------------|--------------|----|--------------|--------|--------|
| Avidity | avidity, Antigen = 1086D7gp120K160 Env only   | MVA/Env      | 8  | ant3_avidity | 1.0000 | 1.0000 |
| Avidity | avidity, Antigen = 1086D7gp120K160 Env only   | MVA/Env      | 14 | ant3_avidity | 0.6905 | 1.0000 |
| Avidity | avidity, Antigen = 1086D7gp120K160 Env+bnAb   | MVA/Env+bnAb | 8  | ant3_avidity | 1.0000 | 1.0000 |
| Avidity | avidity, Antigen = 1086D7gp120K160 Env+bnAb   | MVA/Env+bnAb | 14 | ant3_avidity | 0.4206 | 0.9693 |
| Avidity | avidity, Antigen = gp70-B.CaseA2 V1\ Env only | MVA/Env      | 14 | ant5_avidity | 1.0000 | 1.0000 |
| Avidity | avidity, Antigen = gp70-B.CaseA2 V1\ Env+bnAb | MVA/Env+bnAb | 8  | ant5_avidity | 0.3333 | 0.9422 |
| Avidity | avidity, Antigen = gp70-B.CaseA2 V1\ Env+bnAb | MVA/Env+bnAb | 14 | ant5_avidity | 0.4000 | 0.9693 |
| Avidity | avidity, Antigen = gp70ConC_V3tags Env only   | MVA/Env      | 8  | ant6_avidity | 0.1508 | 0.9422 |
| Avidity | avidity, Antigen = gp70ConC_V3tags Env only   | MVA/Env      | 14 | ant6_avidity | 1.0000 | 1.0000 |
| Avidity | avidity, Antigen = gp70ConC_V3tags Env+bnAb   | MVA/Env+bnAb | 8  | ant6_avidity | 0.9048 | 1.0000 |
| Avidity | avidity, Antigen = gp70ConC_V3tags Env+bnAb   | MVA/Env+bnAb | 14 | ant6_avidity | 0.4206 | 0.9693 |
| Avidity | avidity, Antigen = C.1086C V1V2 Tag Env only  | MVA/Env      | 8  | ant4_avidity | 0.5000 | 1.0000 |
| Avidity | avidity, Antigen = C.1086C V1V2 Tag Env only  | MVA/Env      | 14 | ant4_avidity | 0.4000 | 0.9693 |
| Avidity | avidity, Antigen = C.1086C V1V2 Tag Env+bnAb  | MVA/Env+bnAb | 8  | ant4_avidity | 0.4000 | 0.9693 |
| Avidity | avidity, Antigen = C.1086C V1V2 Tag Env+bnAb  | MVA/Env+bnAb | 14 | ant4_avidity | 0.8413 | 1.0000 |
| Avidity | avidity, Antigen = Bio-V2-1086.C Env only     | MVA/Env      | 14 | ant7_avidity | 0.6667 | 1.0000 |
| Avidity | avidity, Antigen = Bio-V2-1086.C Env+bnAb     | MVA/Env+bnAb | 14 | ant7_avidity | 0.1000 | 0.8833 |
| Avidity | avidity, Antigen = Bio-V3.C Env only          | MVA/Env      | 14 | ant8_avidity | 0.2000 | 0.9422 |
| Avidity | avidity, Antigen = Bio-V3.C Env+bnAb          | MVA/Env+bnAb | 14 | ant8_avidity | 0.7000 | 1.0000 |

<sup>5</sup> Unadjusted p values are Wilcoxon rank sum tests exact p-values. FDR\_p values are the p values adjusted for multiple comparisons using the Benjamini–Hochberg (BH) procedure.
